# Supplementary material for: The E3 ligase VHL promotes follicular helper T cell differentiation via glycolytic-epigenetic control
Source: PubMed Central journal article supplement — J Exp Med. 2019 May 23;216(7):1664–81. doi: 10.1084/jem.20190337 (PMC6605754; doi:10.1084/jem.20190337), 2019-05-23
Supplement: JEM_20190337_sm.pdf [file JEM_20190337_sm.pdf]

## Supplemental material

Zhu et al., <https://doi.org/10.1084/jem.20190337>

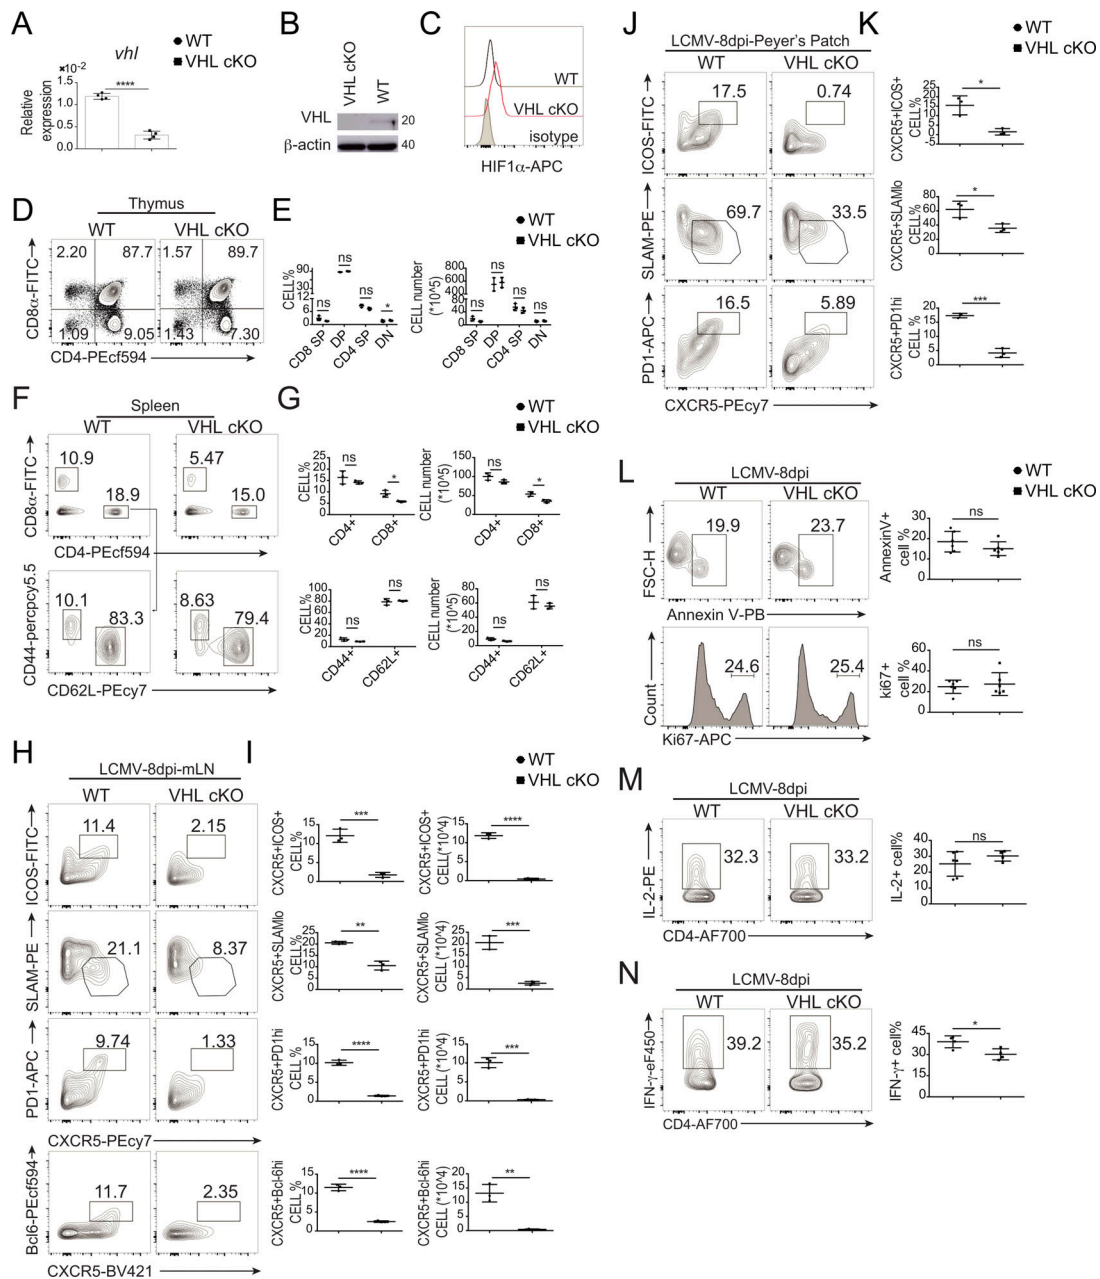

**Figure S1. VHL positively regulates the development of Tfh cells.** Related to Fig. 1. **(A)** qRT-PCR analysis of mRNA of *vhl* in splenic CD4<sup>+</sup> T cells from WT and *CD4<sup>cre</sup>Vhl<sup>fl/fl</sup>* (VHL cKO) mice; gene expression was normalized to that of *Actb* mRNA. **(B)** Immunoblotting analysis of VHL expression in splenic CD4<sup>+</sup> T cells from WT and VHL cKO mice. **(C)** Representative flow-cytometric analysis of HIF-1 $\alpha$  expression in WT and VHL cKO CD4<sup>+</sup> T cells stimulated with anti-CD3 and anti-CD28 for 24 h. **(D)** Representative flow-cytometric plots of CD4<sup>+</sup> or CD8<sup>+</sup> T cells in the thymus from WT and VHL cKO mice. Numbers adjacent to outlined areas indicate frequency of CD8<sup>+</sup>CD4<sup>-</sup> single positive (CD8<sup>+</sup> SP), CD4<sup>+</sup>CD8<sup>+</sup> double positive (DP), CD8<sup>-</sup>CD4<sup>+</sup> (CD4<sup>+</sup> SP), or CD4<sup>-</sup>CD8<sup>-</sup> double negative (DN) thymocytes. **(E)** Quantification of frequency and number of CD8<sup>+</sup> SP, DP, CD4<sup>+</sup> SP, and DN thymocytes as in D ( $n = 3$  per group). **(F)** Representative flow-cytometric plots of CD4<sup>+</sup> or CD8<sup>+</sup> T cells in the spleen from WT and VHL cKO mice. Numbers adjacent to outlined areas indicate frequency of CD4<sup>+</sup> or CD8<sup>+</sup> T cells (top row), CD4<sup>+</sup>CD62L<sup>+</sup>CD44<sup>-</sup> naive T cells, or CD4<sup>+</sup>CD62L<sup>+</sup>CD4<sup>+</sup> effector T cells (bottom row). **(G)** Quantification of frequency and number of indicated T cell subsets in the spleen of mice as in F ( $n = 3$  per group). **(H)** Representative flow-cytometric plots of CD44<sup>+</sup>CD4<sup>+</sup> T cells in mLN from WT and VHL cKO mice 8 d after infection with LCMV. Numbers adjacent to outlined areas indicate frequency of Tfh (CXCR5<sup>+</sup>ICOS<sup>+</sup> or CXCR5<sup>+</sup>SLAMF6<sup>lo</sup>) cells or GC-Tfh (CXCR5<sup>+</sup>PD-1<sup>hi</sup> or CXCR5<sup>+</sup>Bcl-6<sup>hi</sup>) cells. **(I)** Quantification of frequency (among CD44<sup>+</sup>CD4<sup>+</sup> T cells) and number of Tfh and GC-Tfh cells in mLN of mice as in H ( $n = 3$  per group). **(J)** Representative flow-cytometric plots of CD44<sup>+</sup>CD4<sup>+</sup> T cells in PP from WT and VHL cKO mice 8 d after LCMV infection. Numbers adjacent to outlined areas indicate frequency of Tfh (CXCR5<sup>+</sup>ICOS<sup>+</sup> or CXCR5<sup>+</sup>SLAMF6<sup>lo</sup>) cells or GC-Tfh (CXCR5<sup>+</sup>PD-1<sup>hi</sup>) cells. **(K)** Quantification of frequency (among CD44<sup>+</sup>CD4<sup>+</sup> T cells) of Tfh cells and GC-Tfh cells in PP of mice as in J ( $n = 3$  per group). **(L-N)** Left: Representative flow-cytometric analysis of CD44<sup>+</sup>CD4<sup>+</sup> T cells in the spleen from WT and VHL cKO mice 8 d after LCMV infection. Numbers adjacent to outlined areas indicate frequency of AnnexinV<sup>+</sup> dead cells (top row) and Ki67<sup>+</sup> proliferating cells (bottom row) (L), IL-2<sup>+</sup>-producing cells (M) or IFN- $\gamma$ -producing cells (N). Right: Quantification of frequency of indicated CD44<sup>+</sup>CD4<sup>+</sup> T cells in the spleen of mice as in L-N ( $n = 4-6$  per group). Each symbol (E, G, I, K-N) represents an individual mouse; small horizontal lines indicate the mean ( $\pm$  SD). \*,  $P < 0.05$ ; \*\*,  $P < 0.01$ ; \*\*\*,  $P < 0.001$ ; \*\*\*\*,  $P < 0.0001$ ; ns, nonsignificant (Student's *t* test). Data are representative of three independent experiments. FSC-H, forward scatter height.

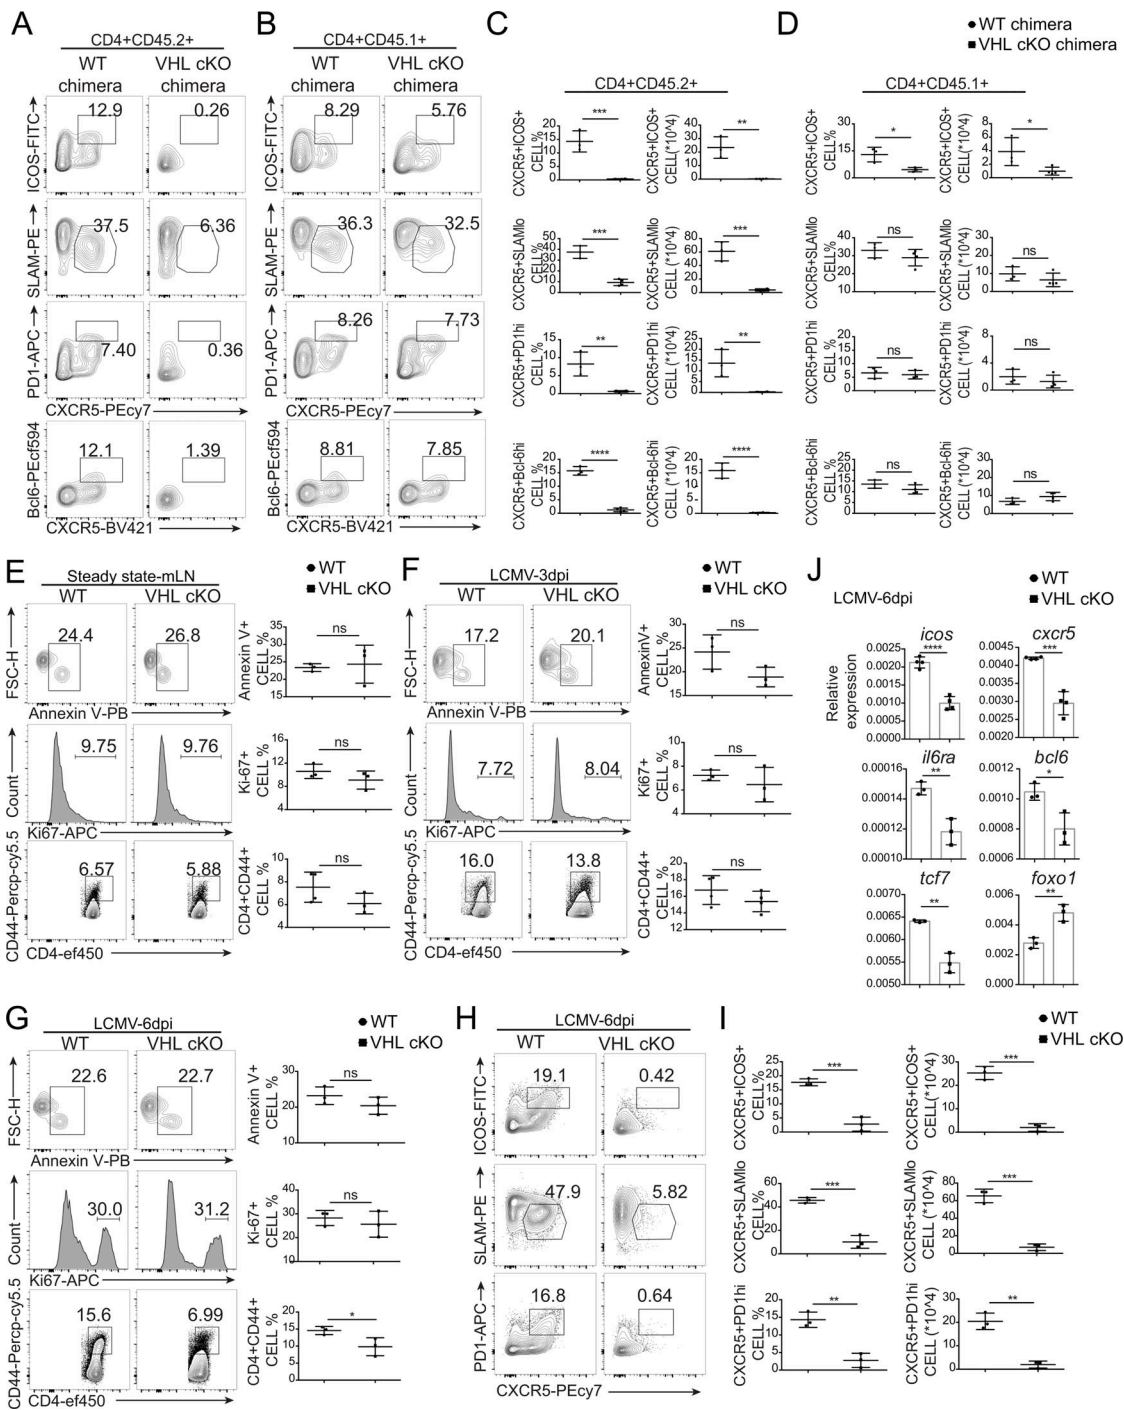

**Figure S2. VHL intrinsically regulates the early development of Tfh cells without affecting cell death and proliferation.** Related to Figs. 2 and 3. **(A and B)** Representative flow-cytometric plots of donor CD45.2<sup>+</sup> (A) or CD45.1<sup>+</sup> control (B) CD4<sup>+</sup>CD44<sup>+</sup> T cells in the spleen from mixed bone marrow chimeras reconstituted for 6–8 wk with WT or VHL cKO (CD45.2<sup>+</sup>) and WT CD45.1<sup>+</sup> bone marrow cells followed by LCMV infection. Numbers adjacent to outlined areas indicate frequency of Tfh (CXCR5<sup>+</sup>ICOS<sup>+</sup> or CXCR5<sup>+</sup>SLAMF6<sup>lo</sup>) cells or GC-Tfh (CXCR5<sup>+</sup>PD-1<sup>hi</sup> or CXCR5<sup>+</sup>Bcl-6<sup>hi</sup>) cells. **(C and D)** Quantification of frequency and number of CD45.2<sup>+</sup> (C) or CD45.1<sup>+</sup> (D) CD4<sup>+</sup>CD44<sup>+</sup> Tfh and GC-Tfh cells of mice as in A and B ( $n = 3$  or 4 per group). **(E–G)** Left: Representative flow-cytometric analysis of CD4<sup>+</sup> T cells from WT and VHL cKO mice under steady state (E), 3 d after LCMV infection (F), or 6 d after LCMV infection (G). Numbers adjacent to outlined areas indicate frequency of Annexin V<sup>+</sup> dead cells (top row), Ki67<sup>+</sup> proliferating cells (middle row), and CD44<sup>+</sup> activated cells (bottom row). Right: Quantification of frequency of indicated CD4<sup>+</sup> T cells from mice as in E–G ( $n = 3$  per group). **(H)** Representative flow-cytometric plots of CD44<sup>+</sup>CD4<sup>+</sup> T cells in the spleen from WT and VHL cKO mice 6 d after infection with LCMV. Numbers adjacent to outlined areas indicate frequency of Tfh (CXCR5<sup>+</sup>ICOS<sup>+</sup> or CXCR5<sup>+</sup>SLAMF6<sup>lo</sup>) cells or GC-Tfh (CXCR5<sup>+</sup>PD-1<sup>hi</sup>) cells. **(I)** Quantification of frequency (among CD44<sup>+</sup>CD4<sup>+</sup> T cells) and number of Tfh or GC-Tfh cells of mice as in H ( $n = 3$  or 4 per group). **(J)** RT-PCR analysis of mRNA of Tfh cell-related genes in CD44<sup>+</sup>CD4<sup>+</sup> T cells from WT and VHL cKO mice 6 d after LCMV infection; results were normalized to those of *Actb* mRNA (encoding  $\beta$ -actin). Each symbol (C–G, I) represents an individual mouse; small horizontal lines indicate the mean ( $\pm$  SD). \*,  $P < 0.05$ ; \*\*,  $P < 0.01$ ; \*\*\*,  $P < 0.001$ ; \*\*\*\*,  $P < 0.0001$ ; ns, nonsignificant (Student's *t* test). Data are representative of three independent experiments.

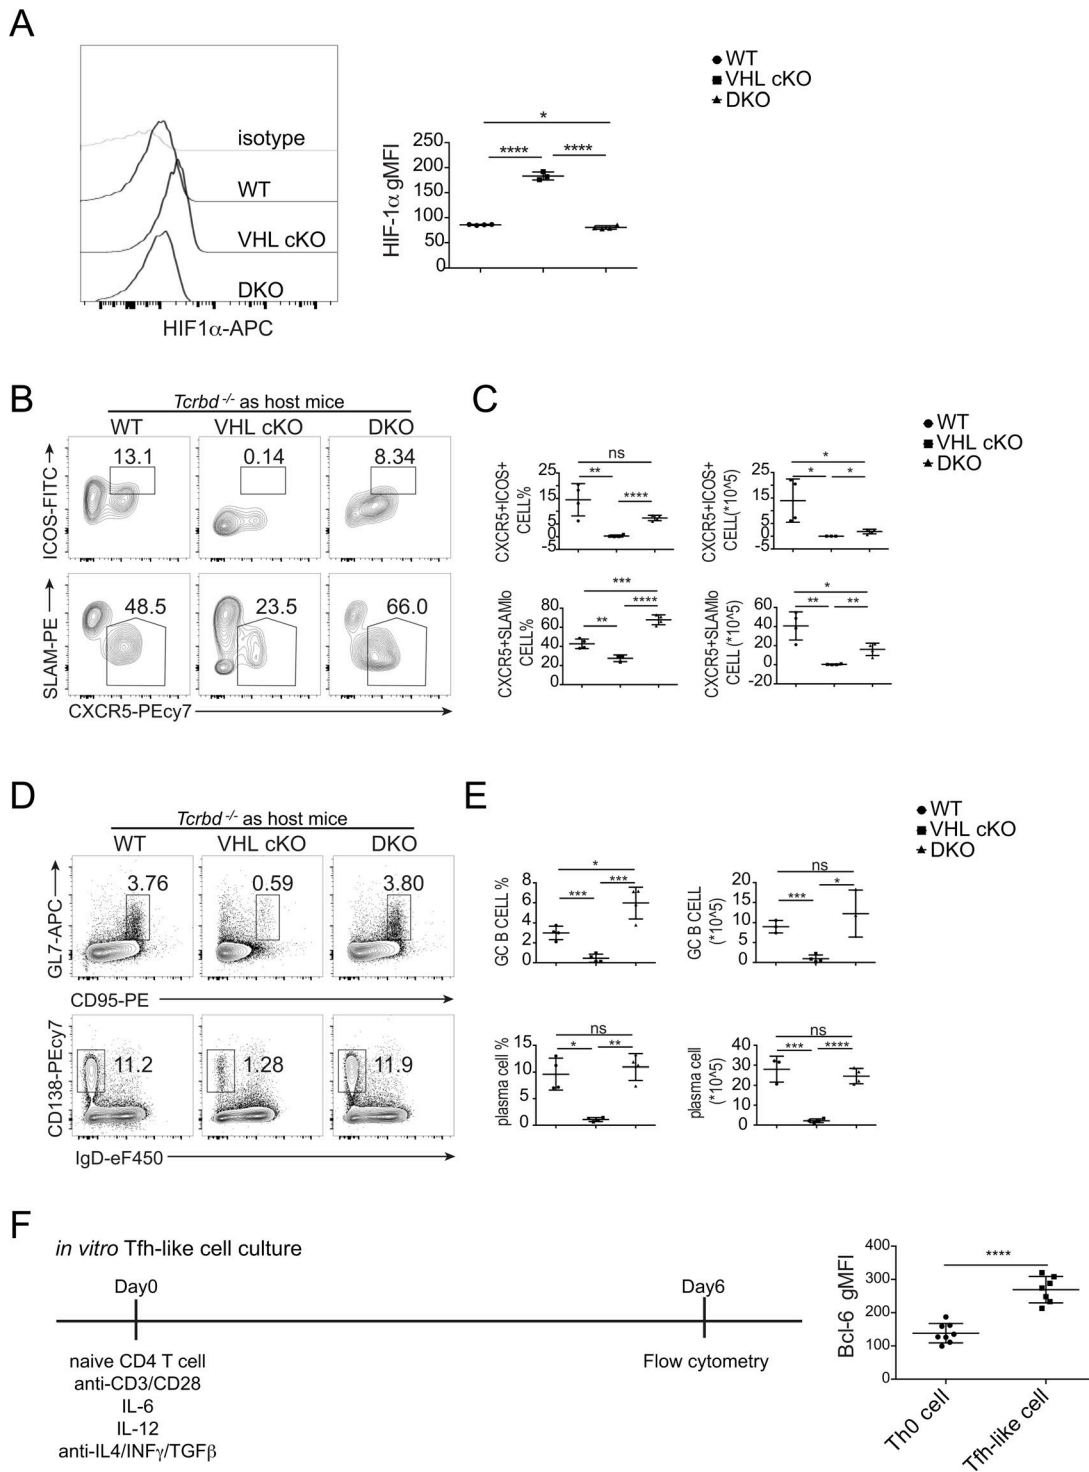

Figure S3. **Rescue by HIF-1 $\alpha$  deficiency.** Related to Fig. 4. **(A)** Representative flow-cytometric analysis of HIF-1 $\alpha$  expression (left) and quantification of HIF-1 $\alpha$  MFI (right) in WT, VHL cKO, and *Vhl*<sup>fl/fl</sup>*Hif1a*<sup>fl/fl</sup>*CD4*<sup>Cre</sup> (DKO) CD4<sup>+</sup> T cells stimulated with anti-CD3 and anti-CD28 for 24 h. **(B)** Representative flow-cytometric plots of donor CD45.2<sup>+</sup>CD4<sup>+</sup> T cells obtained from *Tcrbd*<sup>-/-</sup> host mice receiving naive CD4<sup>+</sup> T cells from WT, VHL cKO, and DKO SMARTA donor mice, followed by infection with LCMV and analysis 8 d after infection. Numbers adjacent to outlined areas indicate frequency of Tfh (CXCR5<sup>+</sup>ICOS<sup>+</sup> or CXCR5<sup>+</sup>SLAMF6) cells. **(C)** Quantification of frequency (among CD45.2<sup>+</sup>CD4<sup>+</sup> T cells) and number (CD45.2<sup>+</sup>CD4<sup>+</sup>) of Tfh cells of *Tcrbd*<sup>-/-</sup> host mice as in B ( $n = 3$  or 4 per group). **(D)** Representative flow-cytometric plots of total B220<sup>+</sup> B cells obtained from *Tcrbd*<sup>-/-</sup> host mice as described in B. Numbers adjacent to outlined areas indicate frequency of GC B (GL7<sup>+</sup>CD95<sup>+</sup>) cells (top row) or plasma CD138<sup>+</sup>IgD<sup>lo</sup> cells (bottom row) in the spleen. **(E)** Quantification of frequency (among B220<sup>+</sup> B cells) and number of GC B and plasma cells in the spleen of mice as in B ( $n = 3$  or 4 per group). **(F)** Workflow of *in vitro* Tfh-like cell culture system (left). Quantification of Bcl-6 MFI (right) in T helper type 0 cells or Tfh-like cells. Each symbol (C and E) represents an individual mouse; small horizontal lines indicate the mean ( $\pm$  SD). \*,  $P < 0.05$ ; \*\*,  $P < 0.01$ ; \*\*\*,  $P < 0.001$ ; \*\*\*\*,  $P < 0.0001$ ; ns, nonsignificant (Student's *t* test). Data are representative of three independent experiments.



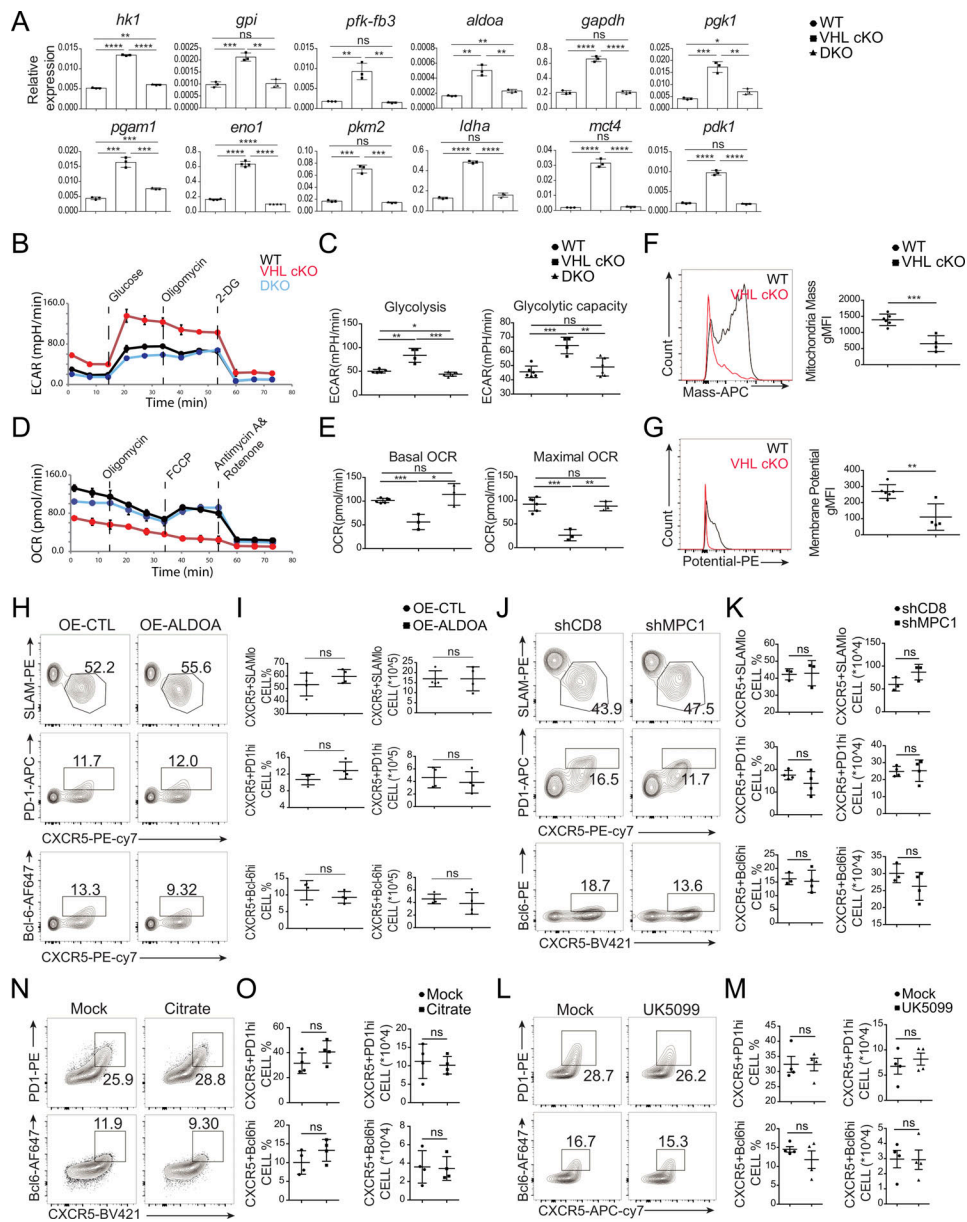

**Figure S4. HIF-1 $\alpha$ -dependent up-regulation of glycolysis and attenuated oxidative metabolism in VHL cKO cells.** Related to Fig. 5. **(A)** qRT-PCR analysis of glycolytic gene expression in CD44<sup>+</sup>CD4<sup>+</sup> T cells from WT, VHL cKO, and DKO mice 8 d after LCMV infection ( $n = 4$  per group); each gene expression was normalized to that of *Actb* mRNA. **(B)** Seahorse traces for ECAR of in vitro activated CD4<sup>+</sup> T cells by anti-CD3 and anti-CD28 from WT, VHL cKO, or DKO mice. **(C)** Quantification of measures of glycolysis (left) and glycolytic capacity (right) of activated CD4<sup>+</sup> T cells from WT, VHL cKO, or DKO mice as in B. **(D)** Seahorse traces for OCR of in vitro activated CD4<sup>+</sup> T cells by anti-CD3 and anti-CD28 from WT, VHL cKO, or DKO mice. **(E)** Quantification of measures of basal OCR (left) and maximal OCR (right) of activated CD4<sup>+</sup> T cells from WT, VHL cKO, or DKO mice as in D. **(F)** Representative flow-cytometric analysis (left) and quantification of MFI (right) of mitochondrial mass in CD4<sup>+</sup>CD44<sup>+</sup> T cells from LCMV-infected WT or VHL cKO mice. **(G)** Representative flow-cytometric analysis (left) and quantification of MFI (right) of mitochondrial membrane potential in CD4<sup>+</sup>CD44<sup>+</sup> T cells as in F. **(H)** Representative flow-cytometric plots of donor SMARTA CD45.1<sup>+</sup>GFP<sup>+</sup>CD4<sup>+</sup> T cells obtained from B6 host mice receiving SMARTA CD4<sup>+</sup> T cells transduced with retroviral vector expressing GFP only (OE-CTL), or ALDOA (OE-ALDOA) followed by infection of host mice with LCMV and analysis 8 d after infection. Numbers adjacent to outlined areas indicate frequency of Tfh (CXCR5<sup>+</sup>SLAMF6<sup>lo</sup>) cells or GC-Tfh (CXCR5<sup>+</sup>PD-1<sup>hi</sup> or CXCR5<sup>+</sup>Bcl-6<sup>hi</sup>) cells. **(I)** Quantification of frequency (among CD4<sup>+</sup>CD45.1<sup>+</sup>GFP<sup>+</sup> T cells) and number (CD4<sup>+</sup>CD45.1<sup>+</sup>GFP<sup>+</sup>) of Tfh and GC-Tfh cells in host mice as in H ( $n = 4$  per group). **(J)** Representative flow-cytometric plots of donor SMARTA CD45.1<sup>+</sup>Ametrine<sup>+</sup>CD4<sup>+</sup> T cells obtained from B6 host mice receiving SMARTA CD4<sup>+</sup> T cells transduced with shCD8 or shMPC1 (Ametrine<sup>+</sup>), followed by infection of host mice with LCMV and analysis 8 d after infection. Numbers adjacent to outlined areas indicate frequency of Tfh (CXCR5<sup>+</sup>SLAMF6<sup>lo</sup>) cells or GC-Tfh (CXCR5<sup>+</sup>PD-1<sup>hi</sup> or CXCR5<sup>+</sup>Bcl-6<sup>hi</sup>) cells. **(K)** Quantification of frequency (among CD4<sup>+</sup>CD45.1<sup>+</sup>Ametrine<sup>+</sup> T cells) and number (CD4<sup>+</sup>CD45.1<sup>+</sup>Ametrine<sup>+</sup>) of Tfh and GC-Tfh cells in host mice as in J ( $n = 3$  or 4 per group). **(L and N)** Representative flow-cytometric plots of donor OT-II CD45.1<sup>+</sup>CD4<sup>+</sup> T cells obtained from B6 host mice receiving WT OT-II CD4<sup>+</sup> T cells cultured in the absence (Mock) or presence of UK5099 (L) or citrate (N) followed by immunization with OVA protein and analysis 7 d after immunization. Numbers adjacent to outlined areas indicate frequency of GC-Tfh (CXCR5<sup>+</sup>PD-1<sup>hi</sup> or CXCR5<sup>+</sup>Bcl-6<sup>hi</sup>) cells. **(M and O)** Quantification of frequency (among CD4<sup>+</sup>CD45.1<sup>+</sup> T cells) and number (CD4<sup>+</sup>CD45.1<sup>+</sup>) of GC-Tfh cells in the popliteal LN of host mice as in L and N ( $n = 4$  per group). Each symbol (F, G, I, K, M, and O) represents an individual mouse; small horizontal lines indicate the mean ( $\pm$  SD). \*,  $P < 0.05$ ; \*\*,  $P < 0.01$ ; \*\*\*,  $P < 0.001$ ; \*\*\*\*,  $P < 0.0001$ ; ns, nonsignificant (Student's *t* test). Data are representative of three independent experiments.

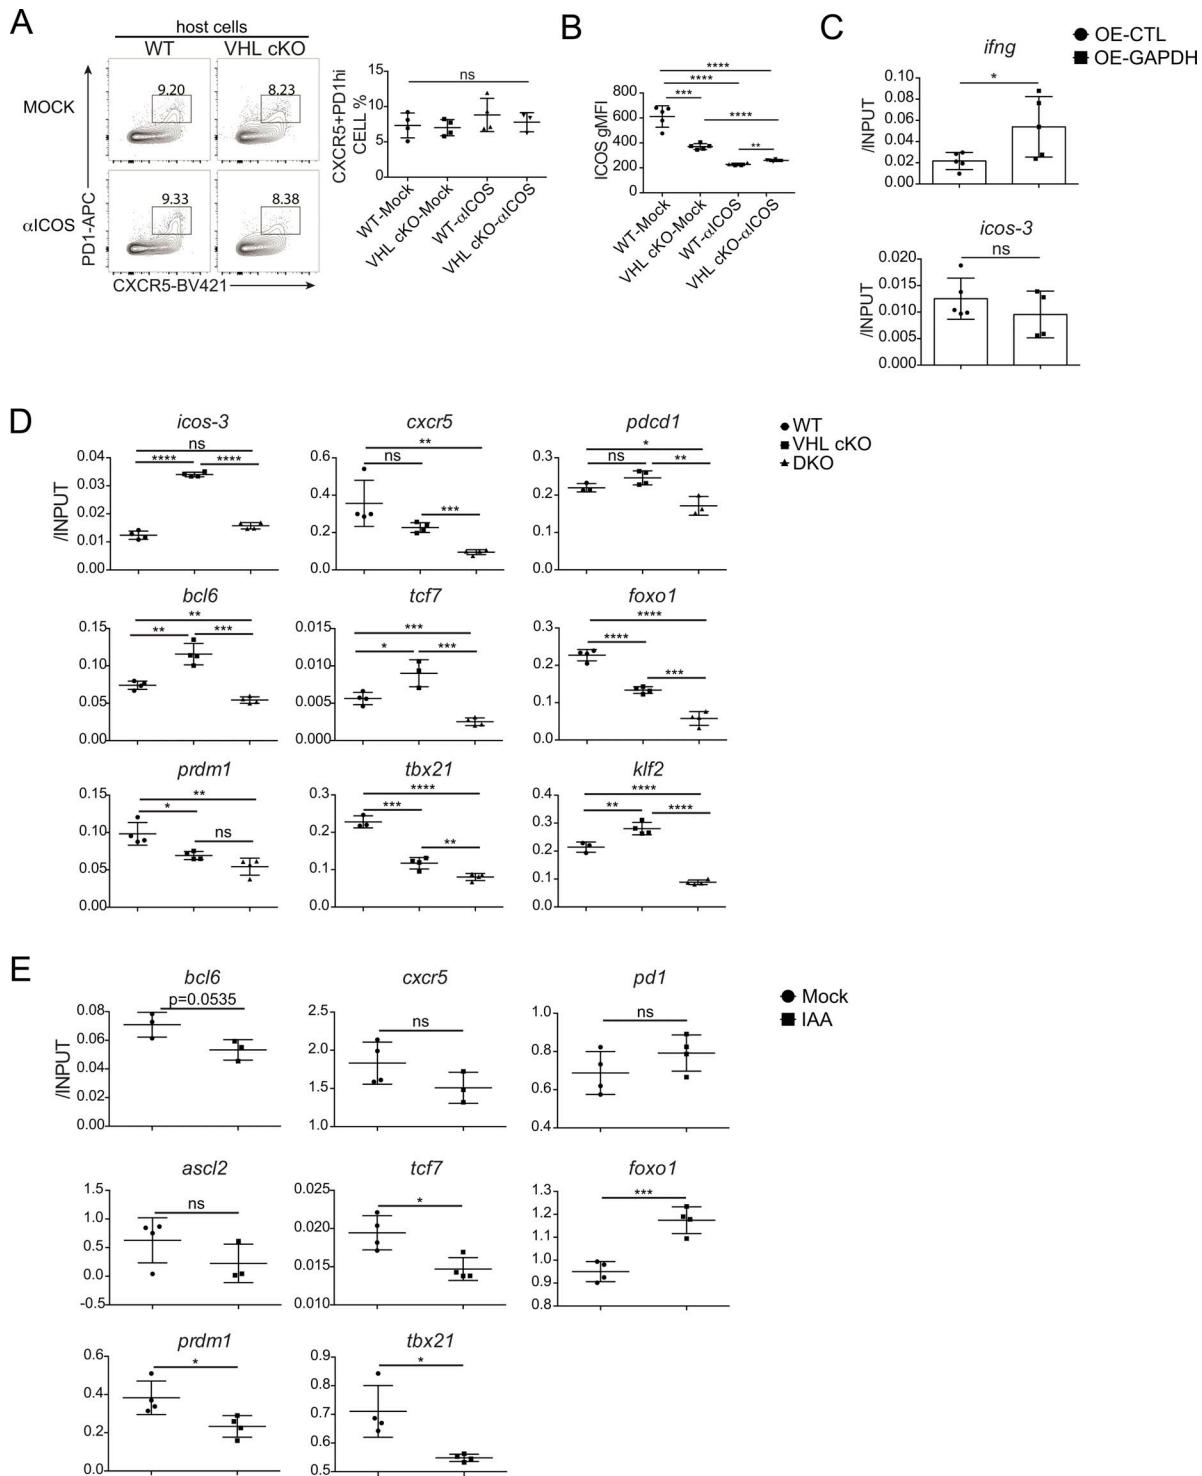

Figure S5. **GAPDH controls *icos* expression via m<sup>6</sup>A modification.** Related to Figs. 6 and 7. **(A)** Representative flow-cytometric plots of host CD45.2<sup>+</sup>CD4<sup>+</sup> T cells (left) and quantification of frequency (among CD45.2<sup>+</sup>CD4<sup>+</sup> T cells) of GC-Tfh cells (right) obtained from B6 host mice receiving WT or VHL cKO OT-II CD4<sup>+</sup> T cells cultured in the absence or presence of anti-ICOS (C398.4A), followed by immunization with OVA protein and analysis 7 d after immunization. Numbers adjacent to outlined areas indicate frequency of CXCR5<sup>+</sup>PD-1<sup>hi</sup> GC-Tfh cells ( $n = 3$  or 4 per group). **(B)** Quantification of ICOS MFI in WT or VHL cKO Tfh-like cells cultured in the absence or presence of anti-ICOS. **(C)** RIP-qRT-PCR analysis of binding of *icos* mRNA or *ifng* mRNA to GAPDH immunoprecipitated with anti-Myc antibody in WT CD4<sup>+</sup> T cells transduced with retroviral vector (Myc-tagged) expressing GFP only (OE-CTL) or GAPDH (OE-GAPDH). Results were normalized to input RNA. **(D)** MERIP-qRT-PCR analysis of indicated mRNAs immunoprecipitated with anti-m<sup>6</sup>A antibody in CD4<sup>+</sup> T cells cultured in vitro with IL-2 and IL-7 for 48 h from WT, VHL cKO, or DKO mice. Results were normalized to input RNA. **(E)** MERIP-qRT-PCR analysis of indicated mRNAs immunoprecipitated with anti-m<sup>6</sup>A antibody in WT CD4<sup>+</sup> T cells cultured in the absence (Mock) or presence of 2.5  $\mu$ M IAA. Results were normalized to input RNA. Each symbol (A) represents an individual mouse; small horizontal lines indicate the mean ( $\pm$  SD). \*,  $P < 0.05$ ; \*\*,  $P < 0.01$ ; \*\*\*,  $P < 0.001$ ; \*\*\*\*,  $P < 0.0001$ ; ns, nonsignificant (Student's  $t$  test). Data are representative of three independent experiments.

Table S1. List of sequences of shRNAmir oligonucleotides

| shRNAmir    | shRNAmir oligonucleotides (5'→3')                                            |
|-------------|------------------------------------------------------------------------------|
| shCD8       | CTCGAGAAGGTATATTGCTGTTGACAGTGAGCGGCATCAGATGTAACAAATCAATAGTGAAGCCACAGATGTA    |
| shScramble  | CTCGAGAAGGTATATTGCTGTTGACAGTGAGCGACCATAGATGTTACCCTTTATTTAGTGAAGCCACAGATGTA   |
| shItch      | CTCGAGAAGGTATATTGCTGTTGACAGTGAGCGATCAAACAATGAAACTTGAATAGTGAAGCCACAGATGTA     |
| shPrdm1     | CTCGAGAAGGTATATTGCTGTTGACAGTGAGCGCCGAGCCATGAATCTCATTAAATAGTGAAGCCACAGATGTA   |
| shCD19      | CTCGAGAAGGTATATTGCTGTTGACAGTGAGCGAAAGATGCAGACTCTTATGAAATAGTGAAGCCACAGATGTA   |
| shCD14      | CTCGAGAAGGTATATTGCTGTTGACAGTGAGCGAGCCTCTTTGTTAAGGAACATTAGTGAAGCCACAGATGTA    |
| shPdcd1     | CTCGAGAAGGTATATTGCTGTTGACAGTGAGCGATCGGAGGATCTTATGCTGAAGTGAAGCCACAGATGTA      |
| shBcl6      | CTCGAGAAGGTATATTGCTGTTGACAGTGAGCGCGCTGTCAAAGAGAAGGCTTTATAGTGAAGCCACAGATGTA   |
| shHif1a     | CTCGAGAAGGTATATTGCTGTTGACAGTGAGCGAACACAGAACTGAAGTCAACTAGTGAAGCCACAGATGTA     |
| shHif2a     | CTCGAGAAGGTATATTGCTGTTGACAGTGAGCGACTGAGAACCTGACTCTCAAATAGTGAAGCCACAGATGTA    |
| shEgln1     | CTCGAGAAGGTATATTGCTGTTGACAGTGAGCGAGGCGTAACCTCATGAAGTACTAGTGAAGCCACAGATGTA    |
| shHk1       | CTCGAGAAGGTATATTGCTGTTGACAGTGAGCGCGTGGTCAAGCTGCTGAATAAATAGTGAAGCCACAGATGTA   |
| shFih       | CTCGAGAAGGTATATTGCTGTTGACAGTGAGCGCCATATAGAGTCACTACTAAATAGTGAAGCCACAGATGTA    |
| shPdk1      | CTCGAGAAGGTATATTGCTGTTGACAGTGAGCGAACAGACACAGTGATAAGGATCTAGTGAAGCCACAGATGTA   |
| shLdha      | CTCGAGAAGGTATATTGCTGTTGACAGTGAGCGACTTGTGACGTCATGGAAGACTAGTGAAGCCACAGATGTA    |
| shGpi1      | CTCGAGAAGGTATATTGCTGTTGACAGTGAGCGCGGCATATTCTGGTGGACTACTAGTGAAGCCACAGATGTA    |
| shPfk-p     | CTCGAGAAGGTATATTGCTGTTGACAGTGAGCGACTCTGACTCAGAAACGAAAGTAGTGAAGCCACAGATGTA    |
| shPfk-l     | CTCGAGAAGGTATATTGCTGTTGACAGTGAGCGCGCTACAATCTGCTCCAACACTAGTGAAGCCACAGATGTA    |
| shGls       | CTCGAGAAGGTATATTGCTGTTGACAGTGAGCGCGCCTTGATCTCTATTCCAGTAGTGAAGCCACAGATGTA     |
| shAldoa     | CTCGAGAAGGTATATTGCTGTTGACAGTGAGCGATGCCAGTATGTTACTGAGAAGTAGTGAAGCCACAGATGTA   |
| shAlodc     | CTCGAGAAGGTATATTGCTGTTGACAGTGAGCGCTCTCTCAACCTCAATGCCATCTAGTGAAGCCACAGATGTA   |
| shGapdh     | CTCGAGAAGGTATATTGCTGTTGACAGTGAGCGAACTGAGCATCTCCCTCACAAATAGTGAAGCCACAGATGTA   |
| shPgk1      | CTCGAGAAGGTATATTGCTGTTGACAGTGAGCGACTAGACAAAGTCAATGAGATGTAGTGAAGCCACAGATGTA   |
| shPgam1     | CTCGAGAAGGTATATTGCTGTTGACAGTGAGCGACGAGATGCTGGCTATGAATTTTAGTGAAGCCACAGATGTA   |
| shEno1      | CTCGAGAAGGTATATTGCTGTTGACAGTGAGCGAACTGTTGAGGTCATCTGACTAGTGAAGCCACAGATGTA     |
| shPkm2      | CTCGAGAAGGTATATTGCTGTTGACAGTGAGCGCGCTTTCATCTGATCCATTCTAGTGAAGCCACAGATGTA     |
| shMct4      | CTCGAGAAGGTATATTGCTGTTGACAGTGAGCGAGGCTGGCTCTCAACTCCAGTAGTGAAGCCACAGATGTA     |
| shMpc1      | CTCGAGAAGGTATATTGCTGTTGACAGTGAGCGCGCTATCAATGACATGAAGAAATAGTGAAGCCACAGATGTA   |
| shPdha      | CTCGAGAAGGTATATTGCTGTTGACAGTGAGCGAGCGGATCAGCTGTATAAGCAGTAGTGAAGCCACAGATGTA   |
| shRictor    | CTCGAGAAGGTATATTGCTGTTGACAGTGAGCGCTCACTTACTTTGCCTACTAAATAGTGAAGCCACAGATGTA   |
| shRaptor    | CTCGAGAAGGTATATTGCTGTTGACAGTGAGCGAAGTGTGAGTGTCAATGGAGATTAGTGAAGCCACAGATGTA   |
| shOgdh      | CTCGAGAAGGTATATTGCTGTTGACAGTGAGCGCGACTTGTGCTGTAAGTAAATAGTGAAGCCACAGATGTA     |
| shSdha      | CTCGAGAAGGTATATTGCTGTTGACAGTGAGCGCGCACTGGATCTTCTGATGGAATAGTGAAGCCACAGATGTA   |
| shSdhb      | CTCGAGAAGGTATATTGCTGTTGACAGTGAGCGAACAGAGGAACGCCTGGCCAAAGTAGTGAAGCCACAGATGTA  |
| shFh        | CTCGAGAAGGTATATTGCTGTTGACAGTGAGCGCAGATTGGAGGTGCTACGGAACACTAGTGAAGCCACAGATGTA |
| shAcly      | CTCGAGAAGGTATATTGCTGTTGACAGTGAGCGCTCATTCACTGTGTATGAAGTAGTGAAGCCACAGATGTA     |
| shCpt1a     | CTCGAGAAGGTATATTGCTGTTGACAGTGAGCGATGCCTCTATGTGGTGTCCAAGTAGTGAAGCCACAGATGTA   |
| shldh1      | CTCGAGAAGGTATATTGCTGTTGACAGTGAGCGCTCTGACTACTTGAATACATTTTAGTGAAGCCACAGATGTA   |
| shldh2      | CTCGAGAAGGTATATTGCTGTTGACAGTGAGCGCGCTGGGAAGCTGGATGGGAAGTGAAGCCACAGATGTA      |
| shHk2       | CTCGAGAAGGTATATTGCTGTTGACAGTGAGCGATCTCTGAAGCTGAGCCATGAATAGTGAAGCCACAGATGTA   |
| shldh3a     | CTCGAGAAGGTATATTGCTGTTGACAGTGAGCGCACCTTGATCTGTATGTTAATAGTGAAGCCACAGATGTA     |
| shldh3g     | CTCGAGAAGGTATATTGCTGTTGACAGTGAGCGCGCTCATATCCGCATCATTAAATAGTGAAGCCACAGATGTA   |
| shldh3b     | CTCGAGAAGGTATATTGCTGTTGACAGTGAGCGAATGCCAATCTCTATGGCAACTAGTGAAGCCACAGATGTA    |
| shPfk-fb3-1 | CTCGAGAAGGTATATTGCTGTTGACAGTGAGCGACTGGAGCCTGTGATCATGGAATAGTGAAGCCACAGATGTA   |

Table S1. List of sequences of shRNAmir oligonucleotides (Continued)

| shRNAmir    | shRNAmir oligonucleotides (5'→3')                                          |
|-------------|----------------------------------------------------------------------------|
| shPfk-fb3-2 | CTCGAGAAGGTATATTGCTGTTGACAGTGAGCGATCCAAGAAGCTGACTCGCTACTAGTGAAGCCACAGATGTA |
| shAco2      | CTCGAGAAGGTATATTGCTGTTGACAGTGAGCGAGCCACGGACTCAAGTGCAAGTAGTGAAGCCACAGATGTA  |
| shMdh2      | CTCGAGAAGGTATATTGCTGTTGACAGTGAGCGAACACGGGATGACCTGTTCAACTAGTGAAGCCACAGATGTA |
| shMettl3    | CTCGAGAAGGTATATTGCTGTTGACAGTGAGCGCAGCTGCACTTCAGACGAATTATAGTGAAGCCACAGATGTA |
| shMettl14   | CTCGAGAAGGTATATTGCTGTTGACAGTGAGCGCTGGGAGAGTATGCTTGCGAAATAGTGAAGCCACAGATGTA |
| shAlkbh5    | CTCGAGAAGGTATATTGCTGTTGACAGTGAGCGATCCGTGTCTTTCTTCAGCGACTAGTGAAGCCACAGATGTA |



Table S2. List of primers used for qRT-PCR

| Gene           | Forward primer (5'→3')    | Reverse primer (5'→3')    |
|----------------|---------------------------|---------------------------|
| <i>β-actin</i> | GCTGTGCTGTCCCTGTATGCCTCT  | CCTCTCAGCTGTGGTGGTGAAGC   |
| <i>Vhl</i>     | GCTGCCTTTGTGGCTCAACTTCG   | TGAGGGATGGCACAAACAGCTCC   |
| <i>Hk1</i>     | CGGAATGGGGAGCCTTTGG       | GCCTTCTTATCCGTTTCAATGG    |
| <i>Pfk-fb3</i> | CCTACCCTGAGGAGTACGCA      | CTCTTGGCGCTCTAATCCA       |
| <i>Aldoa</i>   | TAGTCCTTTTCGCCTACCCACC    | CTCTGTCTGTTGCTGGGTGTT     |
| <i>Gapdh</i>   | TGTGTCCGTCGTGGATCTGA      | CCTGCTTCACCACCTTCTTGA     |
| <i>Gpi1</i>    | GTTGCCTGAAGAGGCCAGG       | GCTGTTGCTTGATGAAGCTGATC   |
| <i>Pgk1</i>    | ATTCTGCTTGACAATGGAGC      | AGGCATGGGAACACCATCA       |
| <i>Eno1</i>    | TGCGTCCACTGGCATCTAC       | CAGAGCAGGCCAATAGTTTTA     |
| <i>Pkm2</i>    | TTGCAGCTATTCGAGGAACTCCG   | CACGATAATGGCCCACTGC       |
| <i>Pdk1</i>    | GGACTTCGGGTCAGTGAATGC     | TCCTGAGAAGATTGTCGGGGA     |
| <i>Pgam1</i>   | TCTGTGCAGAGAGAGCAATCC     | CTGTCCAGACCCCATAGTGT      |
| <i>Ldha</i>    | TGTCTCCAGCAAAGACTACTGT    | GACTGTACTTGACAATGTTGGA    |
| <i>Mct4</i>    | TCACGGGTTTCTCCTACGC       | GCCAAAGCGGTTACACAC        |
| <i>Icos-1</i>  | CACGCTCTGTGCCTGAGTTAGTT   | AGACTGAAGAACACTCCCAGACA   |
| <i>Icos-2</i>  | CAGCTGAAGCTCTGGCTACC      | TTAGGGTCATGCACACTGGA      |
| <i>Icos-3</i>  | TGAATACATGTTTATGGCGG      | TCAGGGGAAGTAGTCCATGC      |
| <i>Pdcd1</i>   | TGGTCATTCACCTGGGCTGT      | AGAAGGTGAGGGACCTCCAG      |
| <i>Cxcr5</i>   | GCTAAGAGAATGACGACAGAGTTCC | CTTGTACGGTTGGCTTGAAGTGGTA |
| <i>Bcl-6</i>   | CCTGTGAAATCTGTGGCACTCG    | CGCAGTTGGCTTTTGTGACG      |
| <i>Foxo1</i>   | GTGGCTCTGTCTGAAAGATCC     | CATTAGGCTGCTCAAGGCTGAA    |
| <i>Il6ra</i>   | GAAGCATGCTGACCGTCG        | GCTTGTCACTGTGCCATTG       |
| <i>Tcf7</i>    | GCGGACATCAGCCAGAAG        | TCACAGTATGGGGAGCTGT       |
| <i>Lef1</i>    | AGCTGAGTGCACGCTAAAGG      | GTATTTGGCTGTCTTCCC        |
| <i>Irf4</i>    | CCGTTGAAGAGGTAGGCTGAGGA   | GGCGTTCCTGTGTCTGGCATA     |
| <i>Prdm1</i>   | ACATAGTGAACGACCACCCTG     | CTTACCACGCCAATAACCTCTTTG  |
| <i>Tbx21</i>   | GCATGAAGCCACACTCCTAC      | ACTGGCCTTCGGTTTCTTATC     |
| <i>Ascl2</i>   | GAGAGCTAAGCCCGATGGAG      | CCCAGGTTTCTTGGGCTAGA      |
| <i>Klf2</i>    | CTAAAGGCGCATCTGCGTA       | TAGTGGCGGTAAGCTCGT        |
| <i>Ifng</i>    | CTTGGATATCTGGAGGAACTGG    | GAATCAGCAGCGACTCCTTTTC    |
| <i>Tet1</i>    | CCGAATCAAGCGGAAGAATA      | ACTTCAGGTTGCACGGTCTC      |
| <i>Tet2</i>    | AGCCCCATCACGTACAAAAC      | TGTGGTGGCTGCTTCTGTAG      |
| <i>Tet3</i>    | CAGCAGCCGAGAAGAAGAAG      | GGACAATCCACCCTTCAGAG      |
| <i>Dnmt1</i>   | GCTACCAGTGCACCTTTGGT      | CAGAGGCAGCTTTTCTCCTG      |
| <i>Mettl3</i>  | CTCCGATGTTGATCTGGAGATAG   | TGGACTGTTCTTGGCTGTT       |
| <i>Mettl14</i> | GATCCAAGGCAGTTTTCCA       | TGAATGAAGTCCCCGTCTGT      |
